# Supplementary material
Source: PubMed Central journal article supplement (PMC6482413)
Supplement: MD-010-C9MD00051H-s001.pdf [file MD-010-C9MD00051H-s001.pdf]

## Supporting information

### **Polybasic peptide-levofloxacin conjugates potentiate fluoroquinolones and other classes of antibiotics against multidrug-resistant Gram-negative bacteria**

Liam Berry<sup>a</sup>, Ronald Domalaon<sup>a</sup>, Marc Brizuela<sup>a</sup>, George G. Zhanel<sup>b</sup>, Frank Schweizer<sup>a,b\*</sup>

<sup>a</sup> Department of Chemistry, University of Manitoba, Winnipeg, MB, Canada

<sup>b</sup> Department of Medical Microbiology and Infectious Diseases, University of Manitoba, Winnipeg, MB, Canada

\* Address correspondence to Professor Frank Schweizer, email: [schweize@cc.umanitoba.ca](mailto:schweize@cc.umanitoba.ca).

## Biological Activity

**Table S1:** Antibacterial activity of peptide-levofloxacin conjugates against a panel of wild-type and multidrug-resistant clinical isolates of Gram-positive and Gram-negative bacteria.

| Organism                                | Minimum inhibitory concentration (MIC) (µg/ml) |      |      |      |      |      |      |      |      |      |      |      |       |
|-----------------------------------------|------------------------------------------------|------|------|------|------|------|------|------|------|------|------|------|-------|
|                                         | 1                                              | 2    | 3    | 4    | 5    | 6    | 7    | 8    | 9    | 10   | 11   | 12   | LVX   |
| <i>S. aureus</i> ATCC 29213             | >128                                           | >128 | >128 | >128 | >128 | >128 | >128 | >128 | 128  | 128  | 64   | >128 | ≤0.25 |
| MRSA ATCC 33592                         | >128                                           | >128 | >128 | >128 | >128 | >128 | >128 | >128 | >128 | >128 | 128  | >128 | ≤0.25 |
| MSSE CANWARD-2008 81388                 | >128                                           | >128 | >128 | 128  | >128 | >128 | >128 | >128 | 64   | 64   | 64   | >128 | ≤0.25 |
| MRSE CAN-ICU 61589                      | >128                                           | >128 | >128 | >128 | >128 | >128 | >128 | >128 | 128  | 128  | 128  | >128 | >128  |
| <i>S. pneumoniae</i> ATCC 49619         | >128                                           | >128 | >128 | 128  | >128 | >128 | >128 | >128 | >128 | >128 | >128 | >128 | 1     |
| <i>E. faecalis</i> ATCC 29212           | >128                                           | >128 | >128 | >128 | >128 | >128 | >128 | >128 | >128 | >128 | >128 | >128 | 2     |
| <i>E. faecium</i> ATCC 27270            | >128                                           | >128 | >128 | >128 | >128 | >128 | >128 | >128 | >128 | >128 | >128 | >128 | 4     |
| <i>E. coli</i> ATCC 25922               | 128                                            | 128  | 128  | >128 | >128 | 128  | >128 | 128  | >128 | 64   | 32   | >128 | ≤0.25 |
| <i>E. coli</i> CAN-ICU 61714            | >128                                           | >128 | >128 | >128 | >128 | >128 | >128 | >128 | >128 | >128 | >128 | >128 | 1     |
| <i>E. coli</i> CAN-ICU 63074            | >128                                           | >128 | >128 | >128 | >128 | >128 | >128 | >128 | >128 | >128 | >128 | >128 | 1     |
| <i>E. coli</i> CANWARD-2011 97615       | >128                                           | >128 | >128 | >128 | >128 | >128 | >128 | >128 | >128 | >128 | >128 | >128 | 16    |
| <i>E. cloacae</i> 117029                | >128                                           | >128 | 128  | 128  | >128 | >128 | 64   | >128 | 128  | 128  | 128  | 128  | 0.125 |
| <i>P. aeruginosa</i> ATCC 27853         | >128                                           | >128 | >128 | >128 | >128 | >128 | >128 | >128 | >128 | >128 | 128  | >128 | 1     |
| <i>P. aeruginosa</i> CAN-ICU 62308      | >128                                           | >128 | >128 | >128 | >128 | >128 | >128 | >128 | >128 | >128 | >128 | >128 | 4     |
| <i>P. aeruginosa</i> CANWARD-2011 96846 | >128                                           | >128 | >128 | >128 | >128 | >128 | >128 | >128 | >128 | >128 | >128 | >128 | 8     |
| <i>P. aeruginosa</i> PAO1               | >128                                           | >128 | >128 | >128 | >128 | >128 | >128 | >128 | 128  | 128  | 128  | 64   | 0.5   |
| <i>S. maltophilia</i> CAN-ICU 62584     | >128                                           | >128 | >128 | >128 | >128 | 16   | >128 | >128 | >128 | >128 | >128 | >128 | 4     |
| <i>A. baumannii</i> CAN-ICU 63169       | >128                                           | >128 | >128 | >128 | >128 | >128 | >128 | >128 | >128 | >128 | >128 | >128 | 1     |
| <i>A. baumannii</i> ATCC 17978          | >128                                           | >128 | >128 | >128 | >128 | >128 | 64   | >128 | 64   | 128  | >128 | >128 | 0.125 |
| <i>K. pneumoniae</i> ATCC 13883         | >128                                           | >128 | >128 | >128 | >128 | 64   | >128 | >128 | >128 | >128 | >128 | >128 | ≤0.25 |
| <i>K. pneumoniae</i> 116381             | >128                                           | >128 | >128 | >128 | >128 | >128 | >128 | >128 | >128 | >128 | >128 | >128 | 128   |

**Table S2:** Synergy evaluation for combinations of ciprofloxacin (CIP) and conjugates **10, 11** and **12** against multidrug-resistant *P. aeruginosa*

| Organism                         | Conjugate | MIC <sub>CIP</sub><br>[MIC <sub>combo</sub><br>(µg/ml)] | MIC <sub>conjugate</sub><br>[MIC <sub>Combo</sub><br>(µg/ml)] | FIC index     | Interpretation | Absolute<br>MIC <sub>CIP</sub> <sup>a</sup><br>(µg/ml) | Potentiatio <sup>b</sup> |
|----------------------------------|-----------|---------------------------------------------------------|---------------------------------------------------------------|---------------|----------------|--------------------------------------------------------|--------------------------|
| <i>P. aeruginosa</i><br>PA259    | <b>10</b> | 128 [8]                                                 | >128 [16]                                                     | 0.063<x<0.188 | Synergy        | 16                                                     | 8-fold                   |
|                                  | <b>11</b> | 128 [8]                                                 | >128 [4]                                                      | 0.063<x<0.094 | Synergy        | 8                                                      | 16-fold                  |
|                                  | <b>12</b> | 128 [4]                                                 | >128 [4]                                                      | 0.031<x<0.063 | Synergy        | 4                                                      | 32-fold                  |
| <i>P. aeruginosa</i><br>PA260    | <b>10</b> | 32 [4]                                                  | >128 [16]                                                     | 0.125<x<0.188 | Synergy        | 4                                                      | 8-fold                   |
|                                  | <b>11</b> | 64 [1]                                                  | >128 [16]                                                     | 0.016<x<0.141 | Synergy        | 4                                                      | 16-fold                  |
|                                  | <b>12</b> | 32 [1]                                                  | 128 [8]                                                       | 0.094         | Synergy        | 1                                                      | 32-fold                  |
| <i>P. aeruginosa</i><br>PA262    | <b>10</b> | 32 [4]                                                  | >128 [32]                                                     | 0.125<x<0.375 | Synergy        | 32                                                     | 1-fold                   |
|                                  | <b>11</b> | 32 [4]                                                  | >128 [8]                                                      | 0.125<x<0.188 | Synergy        | 4                                                      | 8-fold                   |
|                                  | <b>12</b> | 32 [2]                                                  | >128 [16]                                                     | 0.063<x<0.188 | Synergy        | 4                                                      | 8-fold                   |
| <i>P. aeruginosa</i><br>PA264    | <b>10</b> | 32 [4]                                                  | >128 [32]                                                     | 0.125<x<0.375 | Synergy        | 32                                                     | 1-fold                   |
|                                  | <b>11</b> | 32 [4]                                                  | >128 [8]                                                      | 0.125<x<0.188 | Synergy        | 4                                                      | 8-fold                   |
|                                  | <b>12</b> | 32 [2]                                                  | >128 [8]                                                      | 0.063<x<0.125 | Synergy        | 2                                                      | 16-fold                  |
| <i>P. aeruginosa</i><br>PA100036 | <b>10</b> | 32 [4]                                                  | >128 [16]                                                     | 0.125<x<0.250 | Synergy        | 8                                                      | 4-fold                   |
|                                  | <b>11</b> | 32 [8]                                                  | >128 [16]                                                     | 0.125<x<0.375 | Synergy        | 16                                                     | 2-fold                   |
|                                  | <b>12</b> | 32 [8]                                                  | >128 [16]                                                     | 0.250<x<0.375 | Synergy        | 16                                                     | 2-fold                   |
| <i>P. aeruginosa</i><br>PA101885 | <b>10</b> | 64 [8]                                                  | >128 [16]                                                     | 0.125<x<0.250 | Synergy        | 8                                                      | 8-fold                   |
|                                  | <b>11</b> | 32 [8]                                                  | >128 [4]                                                      | 0.250<x<0.281 | Synergy        | 8                                                      | 4-fold                   |
|                                  | <b>12</b> | 32 [8]                                                  | >128 [2]                                                      | 0.250<x<0.266 | Synergy        | 8                                                      | 4-fold                   |

<sup>a</sup>MIC of FQ in presence of 8 µg/ml conjugate

<sup>b</sup>Degree of FQ potentiation in the presence of 8 µg/ml conjugate

**Table S3:** Synergy evaluation for combinations of levofloxacin (LVX) and conjugates **10, 11** and **12** against multidrug-resistant *P. aeruginosa*

| Organism                         | Conjugate | MIC <sub>LVX</sub><br>[MIC <sub>combo</sub><br>(µg/ml)] | MIC <sub>conjugate</sub><br>[MIC <sub>Combo</sub><br>(µg/ml)] | FIC index     | Interpretation | Absolute<br>MIC <sub>LVX</sub> <sup>a</sup><br>(µg/ml) | Potentiatio <sup>b</sup> |
|----------------------------------|-----------|---------------------------------------------------------|---------------------------------------------------------------|---------------|----------------|--------------------------------------------------------|--------------------------|
| <i>P. aeruginosa</i><br>PA259    | <b>10</b> | 256 [8]                                                 | >128 [32]                                                     | 0.031<x<0.281 | Synergy        | 128                                                    | 2-fold                   |
|                                  | <b>11</b> | 256 [16]                                                | >128 [8]                                                      | 0.063<x<0.125 | Synergy        | 16                                                     | 16-fold                  |
|                                  | <b>12</b> | 256 [8]                                                 | >128 [16]                                                     | 0.031<x<0.156 | Synergy        | 16                                                     | 16-fold                  |
| <i>P. aeruginosa</i><br>PA260    | <b>10</b> | 32 [1]                                                  | >128 [16]                                                     | 0.031<x<0.156 | Synergy        | 2                                                      | 16-fold                  |
|                                  | <b>11</b> | 32 [1]                                                  | >128 [8]                                                      | 0.031<x<0.094 | Synergy        | 1                                                      | 32-fold                  |
|                                  | <b>12</b> | 32 [0.5]                                                | 128 [16]                                                      | 0.141         | Synergy        | 1                                                      | 32-fold                  |
| <i>P. aeruginosa</i><br>PA262    | <b>10</b> | 64 [4]                                                  | >128 [16]                                                     | 0.063<x<0.189 | Synergy        | 32                                                     | 2-fold                   |
|                                  | <b>11</b> | 64 [4]                                                  | >128 [16]                                                     | 0.063<x<0.188 | Synergy        | 8                                                      | 8-fold                   |
|                                  | <b>12</b> | 64 [4]                                                  | >128 [8]                                                      | 0.063<x<0.125 | Synergy        | 4                                                      | 16-fold                  |
| <i>P. aeruginosa</i><br>PA264    | <b>10</b> | 64 [16]                                                 | >128 [32]                                                     | 0.25<x<0.5    | Synergy        | 64                                                     | 1-fold                   |
|                                  | <b>11</b> | 64 [8]                                                  | >128 [16]                                                     | 0.125<x<0.25  | Synergy        | 16                                                     | 4-fold                   |
|                                  | <b>12</b> | 64 [4]                                                  | >128 [4]                                                      | 0.063<x<0.094 | Synergy        | 4                                                      | 16-fold                  |
| <i>P. aeruginosa</i><br>PA100036 | <b>10</b> | 64 [4]                                                  | >128 [16]                                                     | 0.063<x<0.188 | Synergy        | 8                                                      | 8-fold                   |
|                                  | <b>11</b> | 64 [8]                                                  | >128 [16]                                                     | 0.125<x<0.25  | Synergy        | 16                                                     | 4-fold                   |
|                                  | <b>12</b> | 64 [8]                                                  | >128 [32]                                                     | 0.125<x<0.375 | Synergy        | 16                                                     | 4-fold                   |
| <i>P. aeruginosa</i><br>PA101885 | <b>10</b> | 32 [8]                                                  | >128 [16]                                                     | 0.25<x<0.375  | Synergy        | 16                                                     | 2-fold                   |
|                                  | <b>11</b> | 32 [8]                                                  | >128 [32]                                                     | 0.25<x<0.5    | Synergy        | 16                                                     | 2-fold                   |
|                                  | <b>12</b> | 32 [8]                                                  | >128 [32]                                                     | 0.25<x<0.5    | Synergy        | 16                                                     | 2-fold                   |

<sup>a</sup>MIC of FQ in presence of 8 µg/ml conjugate

<sup>b</sup>Degree of FQ potentiation in the presence of 8 µg/ml conjugate

**Table S4:** Synergy evaluation for combinations of moxifloxacin (MXF) and conjugates **10, 11** and **12** against multidrug-resistant *P. aeruginosa*

| Organism                         | Conjugate | MIC <sub>MXF</sub><br>[MIC <sub>combo</sub> ]<br>(µg/ml) | MIC <sub>conjugate</sub><br>[MIC <sub>Combo</sub> ]<br>(µg/ml) | FIC index     | Interpretation | Absolute<br>MIC <sub>MXF</sub> <sup>a</sup><br>(µg/ml) | Potentiatio <sup>b</sup> |
|----------------------------------|-----------|----------------------------------------------------------|----------------------------------------------------------------|---------------|----------------|--------------------------------------------------------|--------------------------|
| <i>P. aeruginosa</i><br>PA259    | <b>10</b> | 256 [16]                                                 | >128 [16]                                                      | 0.063<x<0.188 | Synergy        | 128                                                    | 2-fold                   |
|                                  | <b>11</b> | 512 [16]                                                 | >128 [16]                                                      | 0.031<x<0.156 | Synergy        | 32                                                     | 16-fold                  |
|                                  | <b>12</b> | 256 [16]                                                 | >128 [4]                                                       | 0.063<x<0.094 | Synergy        | 16                                                     | 16-fold                  |
| <i>P. aeruginosa</i><br>PA260    | <b>10</b> | 128 [2]                                                  | >128 [8]                                                       | 0.016<x<0.078 | Synergy        | 2                                                      | 64-fold                  |
|                                  | <b>11</b> | 128 [2]                                                  | >128 [8]                                                       | 0.016<x<0.078 | Synergy        | 2                                                      | 64-fold                  |
|                                  | <b>12</b> | 128 [1]                                                  | 128 [8]                                                        | 0.070         | Synergy        | 1                                                      | 128-fold                 |
| <i>P. aeruginosa</i><br>PA262    | <b>10</b> | 128 [16]                                                 | >128 [32]                                                      | 0.125<x<0.375 | Synergy        | 64                                                     | 2-fold                   |
|                                  | <b>11</b> | 128 [16]                                                 | >128 [16]                                                      | 0.125<x<0.250 | Synergy        | 32                                                     | 4-fold                   |
|                                  | <b>12</b> | 128 [8]                                                  | >128 [8]                                                       | 0.063<x<0.125 | Synergy        | 8                                                      | 16-fold                  |
| <i>P. aeruginosa</i><br>PA264    | <b>10</b> | 128 [16]                                                 | >128 [32]                                                      | 0.125<x<0.375 | Synergy        | 64                                                     | 2-fold                   |
|                                  | <b>11</b> | 128 [16]                                                 | >128 [16]                                                      | 0.125<x<0.250 | Synergy        | 64                                                     | 2-fold                   |
|                                  | <b>12</b> | 128 [8]                                                  | >128 [8]                                                       | 0.063<x<0.125 | Synergy        | 8                                                      | 16-fold                  |
| <i>P. aeruginosa</i><br>PA100036 | <b>10</b> | 128 [4]                                                  | >128 [8]                                                       | 0.031<x<0.094 | Synergy        | 4                                                      | 32-fold                  |
|                                  | <b>11</b> | 128 [8]                                                  | >128 [16]                                                      | 0.063<x<0.188 | Synergy        | 16                                                     | 8-fold                   |
|                                  | <b>12</b> | 128 [32]                                                 | >128 [32]                                                      | 0.250<x<0.500 | Synergy        | 128                                                    | 1-fold                   |
| <i>P. aeruginosa</i><br>PA101885 | <b>10</b> | 128 [16]                                                 | >128 [8]                                                       | 0.125<x<0.188 | Synergy        | 16                                                     | 8-fold                   |
|                                  | <b>11</b> | 128 [32]                                                 | >128 [2]                                                       | 0.250<x<0.266 | Synergy        | 64                                                     | 2-fold                   |
|                                  | <b>12</b> | 128 [16]                                                 | >128 [8]                                                       | 0.125<x<0.188 | Synergy        | 16                                                     | 8-fold                   |

<sup>a</sup>MIC of FQ in presence of 8 µg/ml conjugate

<sup>b</sup>Degree of FQ potentiation in the presence of 8 µg/ml conjugate

**Table S5:** Synergy evaluation for combinations of ciprofloxacin (CIP) and conjugates **10**, **11** and **12** against wild-type and multidrug-resistant *E. coli* and *K. pneumoniae*

| Organism                    | Conjugate | MIC <sub>CIP</sub><br>[MIC <sub>combo</sub><br>(μg/ml)] | MIC <sub>Conjugate</sub><br>[MIC <sub>Combo</sub><br>(μg/ml)] | FIC index     | Interpretation | Absolute<br>MIC <sub>CIP</sub> <sup>a</sup><br>(μg/ml) | Potentiatio <sup>b</sup> |
|-----------------------------|-----------|---------------------------------------------------------|---------------------------------------------------------------|---------------|----------------|--------------------------------------------------------|--------------------------|
| <i>E. coli</i> ATCC 25922   | <b>10</b> | 0.016<br>[0.004]                                        | 64 [32]                                                       | 0.75          | Additive       | 0.008                                                  | 2-fold                   |
|                             | <b>11</b> | 0.016<br>[0.004]                                        | 64 [16]                                                       | 0.5           | Synergy        | 0.008                                                  | 2-fold                   |
|                             | <b>12</b> | 0.016<br>[0.004]                                        | 16 [4]                                                        | 0.5           | Synergy        | NT                                                     | NT                       |
| <i>E. coli</i> 107115       | <b>10</b> | 512 [64]                                                | >128 [32]                                                     | 0.125<x<0.375 | Synergy        | 512                                                    | 1-fold                   |
|                             | <b>11</b> | 512 [512]                                               | >128 [0.5]                                                    | 1<x<1.003     | Additive       | 512                                                    | 1-fold                   |
|                             | <b>12</b> | 512 [512]                                               | >128 [0.5]                                                    | 1<x<1.003     | Additive       | 512                                                    | 1-fold                   |
| <i>E. coli</i> 94393        | <b>10</b> | 1 [0.5]                                                 | 64 [16]                                                       | 0.75          | Additive       | 1                                                      | 1-fold                   |
|                             | <b>11</b> | 1 [0.5]                                                 | 128 [32]                                                      | 0.75          | Additive       | 1                                                      | 1-fold                   |
|                             | <b>12</b> | 1 [0.5]                                                 | 128 [1]                                                       | 0.508         | Additive       | 0.5                                                    | 2-fold                   |
| <i>E. coli</i> 94474        | <b>10</b> | 64 [32]                                                 | 128 [8]                                                       | 0.5625        | Additive       | 32                                                     | 2-fold                   |
|                             | <b>11</b> | 64 [32]                                                 | >128 [8]                                                      | 0.500<x<0.563 | Additive       | 32                                                     | 2-fold                   |
|                             | <b>12</b> | 64 [16]                                                 | >128 [16]                                                     | 0.250<x<0.125 | Synergy        | 64                                                     | 1-fold                   |
| <i>K. pneumoniae</i> 113250 | <b>10</b> | 0.125<br>[0.063]                                        | >128 [0.5]                                                    | 0.500<x<0.504 | Additive       | 0.063                                                  | 2-fold                   |
|                             | <b>11</b> | 0.063<br>[0.063]                                        | >128 [0.5]                                                    | 1<x<1.004     | Additive       | 0.063                                                  | 1-fold                   |
|                             | <b>12</b> | 0.125<br>[0.063]                                        | >128 [0.5]                                                    | 0.500<x<0.504 | Additive       | 0.063                                                  | 2-fold                   |
| <i>K. pneumoniae</i> 113254 | <b>10</b> | 0.063<br>[0.063]                                        | >128 [0.5]                                                    | 1<x<1.004     | Additive       | 0.063                                                  | 1-fold                   |
|                             | <b>11</b> | 0.063<br>[0.032]                                        | >128 [8]                                                      | 0.500<x<0.563 | Additive       | 0.032                                                  | 2-fold                   |
|                             | <b>12</b> | 0.063<br>[0.063]                                        | >128 [0.5]                                                    | 1<x<1.004     | Additive       | 0.063                                                  | 1-fold                   |
| <i>K. pneumoniae</i> 116381 | <b>10</b> | 512 [128]                                               | >128 [8]                                                      | 0.250<x<0.313 | Synergy        | 128                                                    | 4-fold                   |
|                             | <b>11</b> | 512 [128]                                               | >128 [16]                                                     | 0.250<x<0.375 | Synergy        | 256                                                    | 2-fold                   |

|  |           |           |          |               |         |     |        |
|--|-----------|-----------|----------|---------------|---------|-----|--------|
|  | <b>12</b> | 512 [128] | >128 [8] | 0.250<x<0.313 | Synergy | 128 | 4-fold |
|--|-----------|-----------|----------|---------------|---------|-----|--------|

<sup>a</sup>MIC of FQ in presence of 8 µg/ml conjugate

<sup>b</sup>Degree of FQ potentiation in the presence of 8 µg/ml conjugate

**Table S6:** Synergy evaluation for combinations of Levofloxacin (LVX) and conjugates **10**, **11** and **12** against wild-type and multidrug-resistant *E. coli* and *K. pneumoniae*

| Organism                    | Conjugate | MIC <sub>LVX</sub><br>[MIC <sub>combo</sub> ]<br>(µg/ml) | MIC <sub>Conjugate</sub><br>[MIC <sub>Combo</sub> ]<br>(µg/ml) | FIC index     | Interpretation | Absolute<br>MIC <sub>LVX</sub> <sup>a</sup><br>(µg/ml) | Potentiation <sup>b</sup> |
|-----------------------------|-----------|----------------------------------------------------------|----------------------------------------------------------------|---------------|----------------|--------------------------------------------------------|---------------------------|
| <i>E. coli</i> ATCC 25922   | <b>10</b> | 0.031<br>[0.008]                                         | 64 [16]                                                        | 0.500         | Synergy        | 0.008                                                  | 2-fold                    |
|                             | <b>11</b> | 0.031<br>[0.008]                                         | 64 [8]                                                         | 0.375         | Synergy        | 0.008                                                  | 2-fold                    |
|                             | <b>12</b> | 0.031<br>[0.008]                                         | 32 [8]                                                         | 0.500         | Synergy        | 0.008                                                  | 2-fold                    |
| <i>E. coli</i> 107115       | <b>10</b> | 32 [8]                                                   | >128 [2]                                                       | 0.250<x<0.266 | Synergy        | 8                                                      | 4-fold                    |
|                             | <b>11</b> | 32 [8]                                                   | >128 [1]                                                       | 0.250<x<0.258 | Synergy        | 8                                                      | 4-fold                    |
|                             | <b>12</b> | 32 [8]                                                   | >128 [1]                                                       | 0.250<x<0.258 | Synergy        | 8                                                      | 4-fold                    |
| <i>E. coli</i> 94393        | <b>10</b> | 1 [0.125]                                                | 64 [16]                                                        | 0.375         | Synergy        | 0.25                                                   | 4-fold                    |
|                             | <b>11</b> | 1 [0.25]                                                 | 128 [4]                                                        | 0.281         | Synergy        | 0.25                                                   | 4-fold                    |
|                             | <b>12</b> | 1 [0.25]                                                 | 128 [4]                                                        | 0.281         | Synergy        | 0.25                                                   | 4-fold                    |
| <i>E. coli</i> 94474        | <b>10</b> | 32 [4]                                                   | 128 [32]                                                       | 0.375         | Synergy        | 8                                                      | 4-fold                    |
|                             | <b>11</b> | 32 [4]                                                   | >128 [16]                                                      | 0.125<x<0.250 | Synergy        | 8                                                      | 4-fold                    |
|                             | <b>12</b> | 32 [4]                                                   | >128 [16]                                                      | 0.125<x<0.250 | Synergy        | 8                                                      | 4-fold                    |
| <i>K. pneumoniae</i> 113250 | <b>10</b> | 0.125<br>[0.031]                                         | >128 [4]                                                       | 0.250<x<0.281 | Synergy        | 0.031                                                  | 4-fold                    |
|                             | <b>11</b> | 0.125<br>[0.031]                                         | >128 [2]                                                       | 0.250<x<0.266 | Synergy        | 0.031                                                  | 4-fold                    |
|                             | <b>12</b> | 0.125<br>[0.031]                                         | >128 [1]                                                       | 0.250<x<0.258 | Synergy        | 0.063                                                  | 2-fold                    |
| <i>K. pneumoniae</i> 113254 | <b>10</b> | 0.063<br>[0.031]                                         | >128 [4]                                                       | 0.500<x<0.531 | Additive       | 0.031                                                  | 2-fold                    |
|                             | <b>11</b> | 0.063                                                    | >128 [4]                                                       | 0.500<x<0.531 | Additive       | 0.063                                                  | 1-fold                    |

|                                |           |                  |           |               |          |       |        |
|--------------------------------|-----------|------------------|-----------|---------------|----------|-------|--------|
|                                |           | [0.031]          |           |               |          |       |        |
|                                | <b>12</b> | 0.063<br>[0.031] | >128 [4]  | 0.500<x<0.531 | Additive | 0.031 | 2-fold |
| <i>K. pneumoniae</i><br>116381 | <b>10</b> | 128 [16]         | >128 [16] | 0.125<x<0.250 | Synergy  | 32    | 4-fold |
|                                | <b>11</b> | 128 [32]         | >128 [4]  | 0.250<x<0.281 | Synergy  | 32    | 4-fold |
|                                | <b>12</b> | 128 [32]         | >128 [4]  | 0.250<x<0.281 | Synergy  | 32    | 4-fold |

<sup>a</sup>MIC of FQ in presence of 8 µg/ml conjugate

<sup>b</sup>Degree of FQ potentiation in the presence of 8 µg/ml conjugate

**Table S7:** Synergy evaluation for combinations of moxifloxacin (MXF) and conjugates **10**, **11** and **12** against wild-type and multidrug-resistant *E. coli* and *K. pneumoniae*



| Organism                    | Conjugate | MIC <sub>MXF</sub><br>[MIC <sub>combo</sub> ]<br>(µg/ml) | MIC <sub>Conjugate</sub><br>[MIC <sub>Combo</sub> ]<br>(µg/ml) | FIC index     | Interpretation | Absolute<br>MIC <sub>MXF</sub> <sup>a</sup><br>(µg/ml) | Potentiatio <sup>b</sup> |
|-----------------------------|-----------|----------------------------------------------------------|----------------------------------------------------------------|---------------|----------------|--------------------------------------------------------|--------------------------|
| <i>E. coli</i> ATCC 25922   | 10        | 0.031<br>[0.004]                                         | 64 [16]                                                        | 0.375         | Synergy        | 0.008                                                  | 2-fold                   |
|                             | 11        | 0.031<br>[0.008]                                         | 64 [4]                                                         | 0.313         | Synergy        | 0.008                                                  | 2-fold                   |
|                             | 12        | 0.063<br>[0.008]                                         | 32 [4]                                                         | 0.250         | Synergy        | 0.008                                                  | 4-fold                   |
| <i>E. coli</i> 107115       | 10        | 32 [2]                                                   | >128 [8]                                                       | 0.063<x<0.125 | Synergy        | 2                                                      | 16-fold                  |
|                             | 11        | 32 [2]                                                   | >128 [8]                                                       | 0.063<x<0.125 | Synergy        | 2                                                      | 16-fold                  |
|                             | 12        | 32 [4]                                                   | >128 [8]                                                       | 0.125<x<0.129 | Synergy        | 4                                                      | 8-fold                   |
| <i>E. coli</i> 94393        | 10        | 1 [0.125]                                                | 64 [8]                                                         | 0.250         | Synergy        | 0.125                                                  | 8-fold                   |
|                             | 11        | 1 [0.125]                                                | 128 [8]                                                        | 0.188         | Synergy        | 0.125                                                  | 8-fold                   |
|                             | 12        | 2 [0.25]                                                 | 128 [2]                                                        | 0.141         | Synergy        | 0.25                                                   | 4-fold                   |
| <i>E. coli</i> 94474        | 10        | 32 [4]                                                   | 128 [32]                                                       | 0.313         | Synergy        | 8                                                      | 4-fold                   |
|                             | 11        | 32 [4]                                                   | >128 [16]                                                      | 0.125<x<0.188 | Synergy        | 4                                                      | 8-fold                   |
|                             | 12        | 32 [4]                                                   | >128 [16]                                                      | 0.125<x<0.188 | Synergy        | 4                                                      | 8-fold                   |
| <i>K. pneumoniae</i> 113250 | 10        | 0.125<br>[0.031]                                         | >128 [8]                                                       | 0.250<x<0.313 | Synergy        | 0.031                                                  | 4-fold                   |
|                             | 11        | 0.125<br>[0.125]                                         | >128 [0.5]                                                     | 1<x<1.004     | Additive       | 0.125                                                  | 1-fold                   |
|                             | 12        | 0.125<br>[0.125]                                         | >128 [0.5]                                                     | 1<x<1.004     | Additive       | 0.125                                                  | 1-fold                   |
| <i>K. pneumoniae</i> 113254 | 10        | 0.125<br>[0.063]                                         | >128 [4]                                                       | 0.500<x<0.531 | Additive       | 0.063                                                  | 2-fold                   |
|                             | 11        | 0.125<br>[0.063]                                         | >128 [2]                                                       | 0.500<x<0.516 | Additive       | 0.063                                                  | 2-fold                   |
|                             | 12        | 0.125<br>[0.063]                                         | >128 [16]                                                      | 0.500<x<0.625 | Additive       | 0.125                                                  | 1-fold                   |
| <i>K. pneumoniae</i> 116381 | 10        | 256 [32]                                                 | >128 [4]                                                       | 0.125<x<0.156 | Synergy        | 32                                                     | 8-fold                   |
|                             | 11        | 256 [32]                                                 | >128 [4]                                                       | 0.125<x<0.156 | Synergy        | 32                                                     | 8-fold                   |
|                             | 12        | 256 [32]                                                 | >128 [2]                                                       | 0.125<x<0.141 | Synergy        | 32                                                     | 8-fold                   |

<sup>a</sup>MIC of FQ in presence of 8 µg/ml conjugate

<sup>b</sup>Degree of FQ potentiation in the presence of 8 µg/ml conjugate

**Table S8:** Synergy evaluation for combinations of ciprofloxacin (CIP) and conjugates **10**, **11** and **12** against wild-type and multidrug-resistant *A. baumannii*

| Organism                          | Conjugate | MIC <sub>CIP</sub><br>[MIC <sub>combo</sub><br>(µg/ml)] | MIC <sub>conjugate</sub><br>[MIC <sub>combo</sub><br>(µg/ml)] | FIC index     | Interpretation | Absolute<br>MIC <sub>CIP</sub> <sup>a</sup><br>(µg/ml) | Potentiation <sup>b</sup> |
|-----------------------------------|-----------|---------------------------------------------------------|---------------------------------------------------------------|---------------|----------------|--------------------------------------------------------|---------------------------|
| <i>A. baumannii</i><br>ATCC 17978 | <b>10</b> | 0.5 [0.5]                                               | 128 [0.5]                                                     | 1.004         | Additive       | 0.5                                                    | 1-fold                    |
|                                   | <b>11</b> | 0.5 [0.5]                                               | 128 [0.5]                                                     | 1.004         | Additive       | 0.5                                                    | 1-fold                    |
|                                   | <b>12</b> | 05 [0.5]                                                | >128 [0.5]                                                    | 1<x<1.004     | Additive       | 0.5                                                    | 1-fold                    |
| <i>A. baumannii</i><br>AB027      | <b>10</b> | 32 [8]                                                  | 128 [32]                                                      | 0.500         | Synergy        | 32                                                     | 1-fold                    |
|                                   | <b>11</b> | 32 [16]                                                 | 128 [2]                                                       | 0.516         | Additive       | 32                                                     | 1-fold                    |
|                                   | <b>12</b> | 32 [16]                                                 | >128 [4]                                                      | 0.500<x<0.531 | Additive       | 32                                                     | 1-fold                    |
| <i>A. baumannii</i><br>AB031      | <b>10</b> | 1 [0.5]                                                 | 32 [0.125]                                                    | 0.504         | Additive       | 0.5                                                    | 2-fold                    |
|                                   | <b>11</b> | 0.5<br>[0.125]                                          | 16 [4]                                                        | 0.500         | Synergy        | NT                                                     | NT                        |
|                                   | <b>12</b> | 1 [0.016]                                               | 8 [2]                                                         | 0.375         | Synergy        | NT                                                     | NT                        |
| <i>A. baumannii</i><br>LAC-4      | <b>10</b> | 32 [16]                                                 | 16 [0.063]                                                    | 0.504         | Additive       | NT                                                     | NT                        |
|                                   | <b>11</b> | 32 [4]                                                  | 8 [2]                                                         | 0.375         | Synergy        | NT                                                     | NT                        |
|                                   | <b>12</b> | 32 [4]                                                  | 8 [1]                                                         | 0.250         | Synergy        | NT                                                     | NT                        |

<sup>a</sup>MIC of FQ in presence of 8 µg/ml conjugate

<sup>b</sup>Degree of FQ potentiation in the presence of 8 µg/ml conjugate

**Table S9:** Synergy evaluation for combinations of levofloxacin (LVX) and conjugates **10**, **11** and **12** against wild-type and multidrug-resistant *A. baumannii*

| Organism                          | Conjugate | MIC <sub>LVX</sub><br>[MIC <sub>combo</sub> ]<br>(µg/ml) | MIC <sub>conjugate</sub><br>[MIC <sub>Combo</sub> ]<br>(µg/ml) | FIC index     | Interpretation | Absolute<br>MIC <sub>LVX</sub> <sup>a</sup><br>(µg/ml) | Potentiatio <sup>b</sup> |
|-----------------------------------|-----------|----------------------------------------------------------|----------------------------------------------------------------|---------------|----------------|--------------------------------------------------------|--------------------------|
| <i>A. baumannii</i><br>ATCC 17978 | <b>10</b> | 0.125<br>[0.125]                                         | 128 [0.5]                                                      | 1.004         | Additive       | 0.125                                                  | 1-fold                   |
|                                   | <b>11</b> | 0.125<br>[0.125]                                         | 128 [0.5]                                                      | 1.004         | Additive       | 0.125                                                  | 1-fold                   |
|                                   | <b>12</b> | 0.125<br>[0.125]                                         | >128 [0.5]                                                     | 1<x<1.004     | Additive       | 0.125                                                  | 1-fold                   |
| <i>A. baumannii</i><br>AB027      | <b>10</b> | 8 [2]                                                    | 128 [32]                                                       | 0.500         | Synergy        | 4                                                      | 2-fold                   |
|                                   | <b>11</b> | 8 [2]                                                    | 128 [32]                                                       | 0.500         | Synergy        | 4                                                      | 2-fold                   |
|                                   | <b>12</b> | 8 [4]                                                    | >128 [0.5]                                                     | 0.500<x<0.504 | Additive       | 4                                                      | 2-fold                   |
| <i>A. baumannii</i><br>AB031      | <b>10</b> | 0.250<br>[0.063]                                         | 32 [8]                                                         | 0.500         | Synergy        | 0.063                                                  | 4-fold                   |
|                                   | <b>11</b> | 0.25<br>[0.031]                                          | 16 [4]                                                         | 0.375         | Synergy        | NT                                                     | NT                       |
|                                   | <b>12</b> | 0.25<br>[0.063]                                          | 16 [0.5]                                                       | 0.281         | Synergy        | NT                                                     | NT                       |
| <i>A. baumannii</i><br>LAC-4      | <b>10</b> | 2 [1]                                                    | 16 [4]                                                         | 0.750         | Additive       | NT                                                     | NT                       |
|                                   | <b>11</b> | 2 [0.5]                                                  | 8 [2]                                                          | 0.500         | Synergy        | NT                                                     | NT                       |
|                                   | <b>12</b> | 2 [0.25]                                                 | 8 [2]                                                          | 0.375         | Synergy        | NT                                                     | NT                       |

<sup>a</sup>MIC of FQ in presence of 8 µg/ml conjugate

<sup>b</sup>Degree of FQ potentiation in the presence of 8 µg/ml conjugate

**Table S10:** Synergy evaluation for combinations of moxifloxacin (MXF) and conjugates **10**, **11** and **12** against wild-type and multidrug-resistant *A. baumannii*

| Organism                          | Conjugate | MIC <sub>MXF</sub><br>[MIC <sub>combo</sub> ]<br>(µg/ml) | MIC <sub>conjugate</sub><br>[MIC <sub>Combo</sub> ]<br>(µg/ml) | FIC index   | Interpretation | Absolute<br>MIC <sub>MXF</sub> <sup>a</sup><br>(µg/ml) | Potentiatio <sup>b</sup> |
|-----------------------------------|-----------|----------------------------------------------------------|----------------------------------------------------------------|-------------|----------------|--------------------------------------------------------|--------------------------|
| <i>A. baumannii</i><br>ATCC 17978 | <b>10</b> | 0.063<br>[0.063]                                         | 128 [0.5]                                                      | 1.004       | Additive       | 0.063                                                  | 1-fold                   |
|                                   | <b>11</b> | 0.063<br>[0.063]                                         | 128 [0.5]                                                      | 1.004       | Additive       | 0.063                                                  | 1-fold                   |
|                                   | <b>12</b> | 0.063<br>[0.063]                                         | >128 [0.5]                                                     | 1<x<1.004   | Additive       | 0.063                                                  | 1-fold                   |
| <i>A. baumannii</i><br>AB027      | <b>10</b> | 4 [1]                                                    | 128 [16]                                                       | 0.375       | Synergy        | 2                                                      | 2-fold                   |
|                                   | <b>11</b> | 4 [1]                                                    | 128 [32]                                                       | 0.500       | Synergy        | 2                                                      | 2-fold                   |
|                                   | <b>12</b> | 4 [2]                                                    | >128 [0.5]                                                     | 0.5<x<0.504 | Additive       | 2                                                      | 2-fold                   |
| <i>A. baumannii</i><br>AB031      | <b>10</b> | 0.125<br>[0.031]                                         | 32 [8]                                                         | 0.500       | Synergy        | 0.031                                                  | 4-fold                   |
|                                   | <b>11</b> | 0.125<br>[0.016]                                         | 16 [4]                                                         | 0.375       | Synergy        | NT                                                     | NT                       |
|                                   | <b>12</b> | 0.125<br>[0.016]                                         | 16 [4]                                                         | 0.375       | Synergy        | NT                                                     | NT                       |
| <i>A. baumannii</i><br>LAC-4      | <b>10</b> | 1 [0.5]                                                  | 16 [4]                                                         | 0.750       | Additive       | NT                                                     | NT                       |
|                                   | <b>11</b> | 1 [0.25]                                                 | 8 [2]                                                          | 0.500       | Synergy        | NT                                                     | NT                       |
|                                   | <b>12</b> | 1 [0.25]                                                 | 8 [2]                                                          | 0.500       | Synergy        | NT                                                     | NT                       |

<sup>a</sup>MIC of FQ in presence of 8 µg/ml conjugate

<sup>b</sup>Degree of FQ potentiation in the presence of 8 µg/ml conjugate

## Characterization

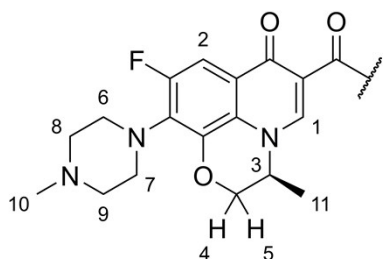

**Figure S1.**  $^1\text{H}$  NMR numbering scheme used for levofloxacin portion of peptide-levofloxacin conjugates.

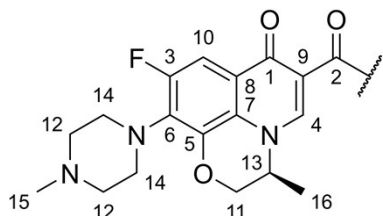

**Figure S2.**  $^{13}\text{C}$  NMR numbering scheme used for levofloxacin portion of peptide-levofloxacin conjugates.

**Conjugate 1:**  $^1\text{H}$  NMR (500 MHz, Methanol- $d_4$ )  $\delta$  8.71 (d,  $J$  = 16.1 Hz, 1H, Levo-1), 7.55 – 7.38 (m, 1H, Levo-2), 4.75 – 4.68 (m, 2H, Dab- $\alpha$  + Levo-3), 4.56 – 4.51 (m, 1H, Levo-4), 4.43 – 4.38 (m, 1H, Levo-5), 3.64 – 3.56 (m, 6H Levo-6,7,8a,9a), 3.31 – 3.28 (m, 2H Levo8b,9b), 3.13 – 3.02 (m, 2H Dab- $\gamma$ ), 2.99 (s, 3H Levo-10), 2.35 – 2.26 (m, 1H Dab- $\beta$ 1), 2.15 – 2.06 (m, 1H Dab- $\beta$ 2), 1.55 (d,  $J$  = 6.9 Hz, 3H Levo-11).  $^{13}\text{C}$  NMR (126 MHz, Methanol- $d_4$ )  $\delta$  174.90(Levo-1), 173.68(Levo-2), 165.62(Levo-3), 156.53(Dab-1 carbonyl), 154.55(Levo-4), 144.96(Levo-5), 140.96(Levo-6), 129.52(Levo-7), 124.33(Levo-8), 109.56(Levo-9), 103.59(Levo-10), 68.42(Levo-11), 55.24(Levo-12), 54.09(Levo-13), 50.29(Dab- $\alpha$ ), 47.49(Levo-14), 42.51(Levo-15), 36.31(Dab- $\gamma$ ), 31.03(Dab- $\beta$ ), 16.72(Levo-16). MALDI-TOF-MS  $m/z$  calcd for  $\text{C}_{22}\text{H}_{29}\text{FN}_6\text{O}_4$  ( $\text{M}+\text{H}$ ) $^+$  monoisotopic peak: 461.2307; found: 461.314

**Conjugate 2:**  $^1\text{H}$  NMR (500 MHz, Methanol- $d_4$ )  $\delta$  8.75 – 8.65 (m, 1H, Levo-1), 7.58 – 7.40 (m, 1H, Levo-2), 4.79 – 4.73 (m, 1H Dab $_1$ - $\alpha$ ), 4.72 – 4.67 (m, 1H Levo-3), 4.58 – 4.49 (m, 2H Dab $_2$ - $\alpha$  + Levo-4), 4.43 – 4.36 (m, 1H Levo-5), 3.67 – 3.55 (m, 6H Levo-6,7,8a,9a), 3.32 – 3.28 (m, 2H Levo8b,9b), 3.15 – 3.04 (m, 4H Dab $_1$ - $\gamma$  + Dab $_2$ - $\gamma$ ), 2.98 (s, 3H Levo-10), 2.37 – 2.19 (m, 2H, Dab $_1$ - $\beta$ 1 + Dab $_2$ - $\beta$ 1), 2.18 – 2.01 (m, 2H Dab $_1$ - $\beta$ 2 + Dab $_2$ - $\beta$ 2), 1.61 – 1.52 (m, 3H Levo-11).  $^{13}\text{C}$  NMR (126 MHz, Methanol- $d_4$ )  $\delta$  174.99 (Levo-1), 173.76 (Levo-2), 171.78 (Dab-1 carbonyl), 165.70 (Levo-3), 156.61 (Dab-2 carbonyl), 154.65 (Levo-4), 145.10 (Levo-5), 141.02 (Levo-6), 129.57(Levo-7), 124.35(Levo-8), 109.55(Levo-9), 103.65(Levo-10), 68.43(Levo-11), 55.31(Levo-12), 54.09(Levo-13), 50.85(Dab $_1$ - $\alpha$ ), 50.77(Dab $_2$ - $\alpha$ ), 47.47(Levo-14), 42.52(Levo-15), 36.42(Dab $_1$ - $\gamma$ ), 36.19(Dab $_2$ - $\gamma$ ), 30.48(Dab $_1$ - $\beta$ ), 29.54(Dab $_2$ - $\beta$ ), 16.78(Levo-16). MALDI-TOF-MS  $m/z$  calcd for  $\text{C}_{26}\text{H}_{37}\text{FN}_8\text{O}_5$  ( $\text{M}+\text{H}$ ) $^+$  monoisotopic peak: 561.2944; found: 561.313

**Conjugate 3:**  $^1\text{H}$  NMR (500 MHz, Methanol- $d_4$ )  $\delta$  8.76 – 8.73 (m, 1H, Levo-1), 7.62 – 7.58 (m, 1H, Levo-2), 4.75 – 4.70 (m, 2H, Dab $_1$ - $\alpha$  + Levo-3), 4.55 (dd,  $J$  = 11.6, 2.1 Hz, 1H, Dab $_2$ - $\alpha$ ), 4.51 (dd,  $J$  = 9.2, 4.7 Hz, 1H, Dab $_3$ - $\alpha$ ), 4.44 – 4.38 (m, 2H, Levo-4 + Levo-5), 3.63 – 3.55 (m, 6H, Levo-6,7,8a,9a), 3.33 – 3.30 (m, 1H, Levo-8b), 3.29 – 3.24 (m, 1H, Levo-9b), 3.12 – 3.05 (m, 6H, Dab $_1$ - $\gamma$  + Dab $_2$ - $\gamma$  + Dab $_3$ - $\gamma$ ), 2.98 (s, 3H, Levo-10), 2.35 – 2.22 (m, 3H, Dab $_1$ - $\beta$ 1 + Dab $_2$ - $\beta$ 1, Dab $_3$ - $\beta$ 1), 2.15 – 2.02 (m, 3H, Dab $_1$ - $\beta$ 2 + Dab $_2$ - $\beta$ 2, Dab $_3$ - $\beta$ 2), 1.55 (d, 3H, Levo-11).  $^{13}\text{C}$  NMR (126 MHz, Methanol- $d_4$ )  $\delta$  175.13(Levo-1), 173.50(Levo-2), 171.90(Dab-1 carbonyl), 171.65(Dab-2 carbonyl), 165.75(Levo-3), 156.77(Dab-3 carbonyl), 154.82(Levo-4), 145.13(Levo-5), 141.11(Levo-6), 129.64(Levo-7), 124.40(Levo-8), 109.62(Levo-9), 103.77(Levo-10), 68.39(Levo-11), 55.28(Levo-12), 54.07(Levo-13), 51.62(Dab1- $\alpha$ ), 50.68(Dab2- $\alpha$ ), 50.54(Dab3- $\alpha$ ), 47.48(Levo-14), 42.48(Levo-15), 36.34(Dab1- $\gamma$ ), 36.33(Dab2- $\gamma$ ), 36.15(Dab3- $\gamma$ ), 30.30(Dab1- $\beta$ ), 29.81(Dab2- $\beta$ ), 28.82(Dab3- $\beta$ ), 16.77(Levo-16). MALDI-TOF-MS  $m/z$  calcd for  $\text{C}_{30}\text{H}_{45}\text{FN}_{10}\text{O}_6$  (M+H) $^+$  monoisotopic peak: 661.3580; found: 661.352

**Conjugate 4:**  $^1\text{H}$  NMR (500 MHz, Methanol- $d_4$ )  $\delta$  8.78 (s, 1H, Levo-1), 7.69 – 7.64 (m, 1H, Levo-2), 4.75 – 4.68 (m, 2H, Dab $_1$ - $\alpha$  + Levo-3), 4.58 – 4.54 (m, 1H, Dab $_2$ - $\alpha$ ), 4.50 – 4.44 (m, 2H, Dab $_3$ - $\alpha$  + Levo-4), 4.42 – 4.37 (m, 2H, Dab $_4$ - $\alpha$  + Levo-5), 3.65 – 3.53 (m, 6H, Levo-6,7,8a,9a), 3.34 – 3.30 (m, 2H, Levo-8b,9b), 3.13 – 3.03 (m, 8H, Dab $_1$ - $\gamma$  + Dab $_2$ - $\gamma$  + Dab $_3$ - $\gamma$  + Dab $_4$ - $\gamma$ ), 2.98 (s, 3H, Levo-10), 2.39 – 2.31 (m, 1H, Dab $_1$ - $\beta$ 1), 2.29 – 2.20 (m, 3H, Dab $_2$ - $\beta$ 1 + Dab $_3$ - $\beta$ 1 + Dab $_4$ - $\beta$ 1), 2.16 – 2.02 (m, 4H, Dab $_1$ - $\beta$ 2 + Dab $_2$ - $\beta$ 2 + Dab $_3$ - $\beta$ 2 + Dab $_4$ - $\beta$ 2), 1.54 (d,  $J$  = 6.7 Hz, 3H, Levo-11).  $^{13}\text{C}$  NMR (126 MHz, Methanol- $d_4$ )  $\delta$  175.20(Levo-1), 173.55(Levo-2), 172.06(Dab-1 carbonyl), 171.75(Dab-2 carbonyl), 171.40(Dab-3 carbonyl), 165.95(Levo-3), 156.87(Dab-4 carbonyl), 154.91(Levo-4), 145.17(Levo-5), 141.11(Levo-6), 129.67(Levo-7), 124.42(Levo-8), 109.64(Levo-9), 103.87(Levo-10), 68.39(Levo-11), 55.30(Levo-12), 54.08(Levo-13), 51.66(Dab1- $\alpha$ ), 51.14(Dab2- $\alpha$ ), 50.83(Dab3- $\alpha$ ), 50.70(Dab4- $\alpha$ ), 47.68(Levo-14), 42.47(Levo-15), 36.36(Dab1- $\gamma$ ), 36.31(Dab2- $\gamma$ ), 36.28(Dab3- $\gamma$ ), 36.20(Dab4- $\gamma$ ), 30.17(Dab1- $\beta$ ), 29.71(Dab2- $\beta$ ), 29.13(Dab3- $\beta$ ), 28.76(Dab4- $\beta$ ), 16.79(Levo-16). MALDI-TOF-MS  $m/z$  calcd for  $\text{C}_{34}\text{H}_{53}\text{FN}_{12}\text{O}_7$  (M+H) $^+$  monoisotopic peak: 761.4217; found: 761.411

**Conjugate 5:**  $^1\text{H}$  NMR (500 MHz, Methanol- $d_4$ )  $\delta$  8.67 (s, 1H, Levo-1), 7.39 – 7.32 (m, 1H, Levo-2), 4.69 – 4.62 (m, 2H, Levo-3 Glu- $\alpha$ ), 4.51 (d,  $J$  = 11.5 Hz, 1H, Levo-4), 4.41 (dd,  $J$  = 11.6, 2.5 Hz, 1H, Levo-5), 3.63 – 3.56 (m, 6H, Levo-6,7,8a,9a), 3.33 – 3.28 (m, 2H, Levo-8b,9b), 3.00 (s, 3H, Levo-10), 2.46 (dd,  $J$  = 12.2, 5.2 Hz, 2H, Glu- $\gamma$ ), 2.27 – 2.20 (m, 1H, Glu- $\beta$ 1), 2.11 – 2.04 (m, 1H, Glu- $\beta$ 2), 1.51 (d,  $J$  = 6.8 Hz, 3H, Levo-11).  $^{13}\text{C}$  NMR (126 MHz, Methanol- $d_4$ )  $\delta$  174.84(Levo-1), 173.45(Levo-2), 165.14(Levo-3), 156.45(Glu carbonyl), 154.49(Levo-4), 144.74(Levo-5), 140.91(Levo-6), 129.30(Levo-7), 124.31(Levo-8), 109.88(Levo-9), 103.40(Levo-10), 68.40(Levo-11), 55.10(Levo-12), 54.13(Levo-13), 52.24(Glu- $\alpha$ ), 47.51(Levo-14), 42.54(Levo-15), 29.68(Glu- $\gamma$ ), 28.08(Glu- $\beta$ ), 16.70(Levo-16). MALDI-TOF-MS  $m/z$  calcd for  $\text{C}_{23}\text{H}_{28}\text{FN}_5\text{O}_6$  (M+H) $^+$  monoisotopic peak: 490.2096; found: 490.256

**Conjugate 6:**  $^1\text{H}$  NMR (500 MHz, Methanol- $d_4$ )  $\delta$  8.71 – 8.68 (m, 1H, Levo-1), 7.42 – 7.32 (m, 1H, Levo-2), 4.71 – 4.66 (m, 1H, Levo-3), 4.65 – 4.61 (m, 1H, Glu $_1$ - $\alpha$ ), 4.54 – 4.49 (m, 1H Levo-4), 4.43 – 4.38 (m, 2H Levo-5 + Glu $_2$ - $\alpha$ ), 3.63 – 3.56 (m, 6H, Levo-6,7,8a,9a), 3.32 – 3.27 (m, 2H Levo-8b,9b), 3.00 (s, 3H, Levo-10), 2.48 (t,  $J$  = 7.8 Hz, 2H, Glu $_1$ - $\gamma$ ), 2.42 (t,  $J$  = 7.7 Hz, 2H, Glu $_2$ - $\gamma$ ), 2.27 – 2.20 (m, 1H Glu $_1$ - $\beta$ 1), 2.17 – 2.07 (m, 2H Glu $_1$ - $\beta$ 2 + Glu $_2$ - $\beta$ 1), 2.00 – 1.92 (m, 1H Glu $_2$ - $\beta$ 2), 1.52 (d,  $J$  = 6.7 Hz, 3H Levo-11).  $^{13}\text{C}$  NMR (126 MHz, Methanol- $d_4$ )  $\delta$  175.04(Levo-1), 174.90(Levo-2), 174.85(Glu $_1$ -COOH), 172.33(Glu $_2$ -COOH), 172.21(Glu $_1$ -carbonyl), 165.42(Levo-3), 156.48(Glu $_2$ -carbonyl), 154.49(Levo-4), 144.86(Levo-5), 140.89(Levo-6), 129.44(Levo-7), 124.30(Levo-8), 109.83(Levo-9), 103.62(Levo-10), 68.42(Levo-11), 55.14(Levo-12), 54.15(Levo-13), 52.77(Glu $_1$ - $\alpha$ ), 52.58(Glu $_2$ - $\alpha$ ), 47.52(Levo-14), 42.58(Levo-15), 29.79(Glu $_1$ - $\gamma$ ), 29.66(Glu $_2$ - $\gamma$ ), 27.68(Glu $_2$ - $\beta$ ), 26.76(Glu $_2$ - $\beta$ ), 16.76(Levo-16). MALDI-TOF-MS  $m/z$  calcd for  $\text{C}_{28}\text{H}_{35}\text{FN}_6\text{O}_9$  (M+H) $^+$  monoisotopic peak: 619.2522; found: 619.244

**Conjugate 7:**  $^1\text{H}$  NMR (500 MHz, Methanol- $d_4$ )  $\delta$  8.74 – 8.70 (m, 1H, Levo-1), 7.51 – 7.44 (m, 1H, Levo-2), 4.75 – 4.70 (m, 1H, Levo-3), 4.55 – 4.51 (m, 1H, Levo-4), 4.48 – 4.41 (m, 2H, Glu $_1$ - $\alpha$  + Levo-5), 4.37 – 4.32 (m, 2H, Glu $_2$ - $\alpha$  + Glu $_3$ - $\alpha$ ), 3.63 – 3.57 (m, 6H, Levo-6,7,8a,9a), 3.32 – 3.29 (m, 2H, Levo-8b,9b), 3.00 (s, 3H, Levo-10), 2.53 – 2.48 (m, 2H, Glu $_1$ - $\gamma$ ), 2.46 – 2.39 (m, 4H, Glu $_2$ - $\gamma$  + Glu $_3$ - $\gamma$ ), 2.24 – 2.10 (m, 4H, Glu $_1$ - $\beta$  + Glu $_2$ - $\beta$ 1 + Glu $_3$ - $\beta$ 1), 2.05 – 1.95 (m, 2H Glu $_2$ - $\beta$ 2 + Glu $_3$ - $\beta$ 2), 1.51 (d,  $J$  = 6.8 Hz, 3H, Levo-11).  $^{13}\text{C}$  NMR (126 MHz, Methanol- $d_4$ )  $\delta$  175.20(Levo-1), 175.09(Levo-2), 175.01(Glu $_1$ -COOH), 174.93(Glu $_2$ -COOH), 174.72(Glu $_3$ -COOH), 173.12(Glu $_1$ -carbonyl), 172.37(Glu $_2$ -carbonyl), 165.92(Levo-3), 159.04(Glu $_3$ -carbonyl), 154.65(Levo-4), 144.95(Levo-5), 140.94(Levo-6), 129.49(Levo-7), 124.36(Levo-8), 109.83(Levo-9), 103.76(Levo-10), 68.40(Levo-11), 55.19(Levo-12), 54.15(Levo-13), 53.64(Glu $_1$ - $\alpha$ ), 53.52(Glu $_2$ - $\alpha$ ), 52.78(Glu $_3$ - $\alpha$ ), 47.48(Levo-14), 42.57(Levo-15), 30.12(Glu $_1$ - $\gamma$ ), 29.84(Glu $_2$ - $\gamma$ ), 29.68(Glu $_3$ - $\gamma$ ), 27.13(Glu $_1$ - $\beta$ ), 26.79(Glu $_2$ - $\beta$ ), 25.90(Glu $_3$ - $\beta$ ), 16.90(Levo-16). MALDI-TOF-MS  $m/z$  calcd for  $\text{C}_{33}\text{H}_{42}\text{FN}_7\text{O}_{12}$  (M+H) $^+$  monoisotopic peak: 748.2948; found: 748.295

**Conjugate 8:**  $^1\text{H}$  NMR (500 MHz, Methanol- $d_4$ )  $\delta$  8.77 – 8.71 (m, 1H, Levo-1), 7.55 – 7.47 (m, 1H, Levo-2), 4.76 – 4.70 (m, 1H, Levo-3), 4.57 – 4.51 (m, 1H, Levo-4), 4.48 – 4.39 (m, 2H, Glu $_1$ - $\alpha$  + Levo-5), 4.37 – 4.29 (m, 3H, Glu $_2$ - $\alpha$  + Glu $_3$ - $\alpha$ , Glu $_4$ - $\alpha$ ), 3.65 – 3.57 (m, 6H, Levo-6,7,8a,9a), 3.35 – 3.30 (m, 2H, Levo-8b,9b), 3.01 (s, 3H, Levo-10), 2.54 – 2.40 (m, 8H, Glu $_1$ - $\gamma$  + Glu $_2$ - $\gamma$  + Glu $_3$ - $\gamma$  + Glu $_4$ - $\gamma$ ), 2.26 – 2.08 (m, 6H, , Glu $_1$ - $\beta$  + Glu $_2$ - $\beta$  + Glu $_3$ - $\beta$ 1 + Glu $_4$ - $\beta$ 1), 2.04 – 1.95 (m, 2H, Glu $_3$ - $\beta$ 2 + Glu $_4$ - $\beta$ 2), 1.50 (d,  $J$  = 6.7 Hz, 3H, Levo-11).  $^{13}\text{C}$  NMR (126 MHz, Methanol- $d_4$ )  $\delta$  175.22(Levo-1), 175.18(Levo-2), 175.15(Glu $_1$ -COOH), 175.08(Glu $_2$ -COOH), 175.03(Glu $_3$ -COOH), 175.02(Glu $_4$ -COOH), 174.72(Glu $_1$ -carbonyl), 173.49(Glu $_2$ -carbonyl), 172.96(Glu $_3$ -carbonyl), 172.43(Glu $_4$ -carbonyl), 166.19(Levo-3), 154.66(Levo-4), 145.07(Levo-5), 140.97(Levo-6), 129.56(Levo-7), 124.37(Levo-8), 109.75(Levo-9), 103.79(Levo-10), 68.42(Levo-11), 55.22(Levo-12), 54.17(Levo-13), 54.08(Glu $_1$ - $\alpha$ ), 54.01(Glu $_2$ - $\alpha$ ), 53.54(Glu $_3$ - $\alpha$ ), 52.80(Glu $_4$ - $\alpha$ ), 47.77(Levo-14), 42.63(Levo-15), 30.20(Glu $_1$ - $\gamma$ ), 29.95(Glu $_2$ - $\gamma$ ), 29.86(Glu $_3$ - $\gamma$ ), 29.74(Glu $_4$ - $\gamma$ ), 26.96(Glu $_1$ - $\beta$ ), 26.67(Glu $_2$ - $\beta$ ), 26.47(Glu $_3$ - $\beta$ ), 25.69(Glu $_4$ - $\beta$ ), 16.96(Levo-16). MALDI-TOF-MS  $m/z$  calcd for  $\text{C}_{38}\text{H}_{50}\text{FN}_8\text{O}_{15}$  (M+H) $^+$  monoisotopic peak: 877.3374; found: 877.377

**Conjugate 9:**  $^1\text{H}$  NMR (500 MHz, Methanol- $d_4$ )  $\delta$  8.73 (s, 1H, Levo-1), 7.60 (d,  $J = 12.2$  Hz, 1H, Levo-2), 4.72 – 4.68 (m, 1H, Levo-3), 4.54 (dd,  $J = 11.5, 2.2$  Hz, 1H, Levo-4), 4.46 (dd,  $J = 8.6, 5.5$  Hz, 1H, Dab- $\alpha$ ), 4.41 (dd,  $J = 11.6, 2.6$  Hz, 1H, Levo-5), 3.63 – 3.55 (m, 6H Levo-6,7,8a,9a), 3.42 – 3.38 (m, 2H Aliphatic), 3.30 – 3.24 (m, 2H Levo8b,9b), 3.02 – 2.96 (m, 5H, Dab- $\gamma$  + Levo-10), 2.26 (t,  $J = 8.3, 6.9$  Hz, 2H, Aliphatic), 2.20 – 2.14 (m, 1H Dab- $\beta$ 1), 2.00 – 1.94 (m, 1H, Dab- $\beta$ 2), 1.63 – 1.58 (m, 4H, Aliphatic), 1.53 (d,  $J = 6.8$  Hz, 3H Levo-11), 1.42 – 1.27 (m, 16H, Aliphatic).  $^{13}\text{C}$  NMR (126 MHz, Methanol- $d_4$ )  $\delta$  175.21(Levo-1), 174.00(Levo-2), 165.30(Levo-3), 156.70(Dab-1 carbonyl), 154.75(Levo-4), 144.70(Levo-5), 141.03(Aliphatic-carbonyl) 140.99(Levo-6), 129.45(Levo-7), 124.44(Levo-8), 110.32(Levo-9), 103.75(Levo-10), 103.56, 68.38(Levo-11), 55.14(Levo-12), 54.09(Levo-13), 50.33(Dab- $\alpha$ ), 47.50(Levo-14), 42.50(Levo-15), 38.74(Aliphatic), 36.40(Dab- $\gamma$ ), 35.35(Aliphatic), 29.71(Dab- $\beta$ ), 29.18(Aliphatic), 29.13(Aliphatic), 29.01, 28.94, 28.93, 26.69, 25.35, 16.77(Levo-16). MALDI-TOF-MS  $m/z$  calcd for  $\text{C}_{34}\text{H}_{52}\text{FN}_7\text{O}_5$  (M+H) $^+$  monoisotopic peak: 658.4087; found: 658.388

**Conjugate 10:**  $^1\text{H}$  NMR (500 MHz, Methanol- $d_4$ )  $\delta$  8.74 (s, 1H, Levo-1), 7.65 – 7.61 (m, 1H, Levo-2), 4.73 – 4.68 (m, 1H, Levo-3), 4.54 (dd,  $J = 11.6, 2.2$  Hz, 1H, Levo-4), 4.47 (dd,  $J = 9.1, 4.9$  Hz, 1H, Dab $_1$ - $\alpha$ ), 4.42 – 4.37 (m, 2H, Levo-5 + Dab $_2$ - $\alpha$ ), 3.65 – 3.55 (m, 6H Levo-6,7,8a,9a), 3.41 (t,  $J = 7.0$  Hz, 2H Aliphatic), 3.31 – 3.29 (m, 2H Levo8b,9b), 3.07 – 2.99 (m, 4H Dab $_1$ - $\gamma$  + Dab $_2$ - $\gamma$ ), 2.98 (s, 3H, Levo-10), 2.25 (t,  $J = 7.4$  Hz, 2H, Aliphatic), 2.22 – 2.12 (m, 2H, Dab $_1$ - $\beta$ 1 + Dab $_2$ - $\beta$ 1), 2.06 – 1.98 (m, 2H Dab $_2$ - $\beta$ 2 + Dab $_2$ - $\beta$ 2), 1.64 – 1.57 (m, 4H, Aliphatic), 1.54 (d,  $J = 6.8$  Hz, 3H, Levo-11), 1.49 – 1.10 (m, 16H, Aliphatic).  $^{13}\text{C}$  NMR (126 MHz, Methanol- $d_4$ )  $\delta$  175.48(Levo-1), 175.21(levo-2), 175.20(Levo-3), 173.54(Dab-1 carbonyl), 171.98(Dab-2 carbonyl), 165.33(Levo-4), 144.74(Levo-5), 141.02(Aliphatic carbonyl), 129.45(Levo-6), 129.33(Levo-7), 124.45(Levo-8), 113.47(Levo-9), 103.76(Levo-10), 68.38(Levo-11), 55.15(Levo-12), 54.09(Levo-13), 51.15(Dab $_1$ - $\alpha$ ), 50.52(Dab $_2$ - $\alpha$ ), 47.49(Levo-14), 42.49(Levo-15), 38.75(Aliphatic), 36.33(Dab $_1$ - $\gamma$ ), 36.23(Dab $_2$ - $\gamma$ ), 35.23(Aliphatic), 29.71(Dab $_1$ - $\beta$ ), 29.20(Dab $_2$ - $\beta$ ), 29.19(Aliphatic), 29.14(Aliphatic), 29.12, 29.00, 28.95, 28.94, 26.70, 25.34, 16.76(Levo-16). MALDI-TOF-MS  $m/z$  calcd for  $\text{C}_{34}\text{H}_{52}\text{FN}_7\text{O}_5$  (M+H) $^+$  monoisotopic peak: 758.4723; found: 758.458

**Conjugate 11:**  $^1\text{H}$  NMR (500 MHz, Methanol- $d_4$ )  $\delta$  8.74 (s, 1H, Levo-1), 7.65 (d,  $J = 12.2$  Hz, 1H, Levo-2), 4.73 – 4.69 (m, 1H, Levo-3), 4.54 (dd,  $J = 11.5, 2.2$  Hz, 1H, Levo-4), 4.47 – 4.37 (m, 4H, Dab $_1$ - $\alpha$  + Levo-5 + Dab $_2$ - $\alpha$  + Dab $_3$ - $\alpha$ ), 3.65 – 3.55 (m, 6H Levo-6,7,8a,9a), 3.42 (t,  $J = 7.1$  Hz, 2H, Aliphatic-a), 3.30 – 3.30 (m, 2H, Levo8b,9b), 3.08 – 3.01 (m, 6H, Dab $_1$ - $\gamma$  + Dab $_2$ - $\gamma$  + Dab $_3$ - $\gamma$ ), 2.98 (s, 3H Levo-10), 2.27 – 2.15 (m, 5H, Aliphatic-b + Dab $_1$ - $\beta$ 1 + Dab $_2$ - $\beta$ 1 + Dab $_3$ - $\beta$ 1), 2.09 – 2.01 (m, 3H, Dab $_1$ - $\beta$ 2 + Dab $_2$ - $\beta$ 2 + Dab $_3$ - $\beta$ 2), 1.65 – 1.57 (m, 4H, Aliphatic-c+d), 1.54 (d,  $J = 6.8$  Hz, 3H, Levo-11), 1.46 – 1.25 (m, 16H, Aliphatic-m).  $^{13}\text{C}$  NMR (126 MHz, Methanol- $d_4$ )  $\delta$  175.48(Levo-1), 175.25(levo-2), 175.23(Levo-3), 173.48(Dab-1 carbonyl), 172.16(Dab-2 carbonyl), 171.52(Dab-3 carbonyl), 165.35(Levo-4), 144.76(Levo-5), 141.06(Aliphatic carbonyl), 129.45(Levo-6), 129.32(Levo-7), 124.46(Levo-8), 110.34(Levo-9), 103.77(Levo-10), 68.38(Levo-11), 55.16(Levo-12), 54.10(Levo-13), 51.23(Dab $_1$ - $\alpha$ ), 51.10(Dab $_2$ - $\alpha$ ), 50.60(Dab $_3$ - $\alpha$ ), 47.51(Levo-14), 42.48(Levo-15), 38.75(Aliphatic-a), 36.29(Dab $_1$ - $\gamma$ ), 36.24(Dab $_2$ - $\gamma$ ), 36.23(Dab $_3$ - $\gamma$ ), 35.24(Aliphatic-b), 29.76(Dab $_1$ - $\beta$ ), 29.22(Dab $_2$ - $\beta$ ), 29.20(Dab $_3$ - $\beta$ ), 29.15(Aliphatic-c), 29.13(Aliphatic-d), 29.08, 29.01, 28.96, 28.95, 26.71, 25.35, 16.74(Levo-16). MALDI-TOF-MS  $m/z$  calcd for  $\text{C}_{42}\text{H}_{68}\text{FN}_{11}\text{O}_7$  (M+H) $^+$  monoisotopic peak: 858.5360; found: 858.499



**Conjugate 12:**  $^1\text{H}$  NMR (500 MHz, Methanol- $d_4$ )  $\delta$  8.74 (s, 1H, Levo-1), 7.65 (d,  $J = 12.1$  Hz, 1H, Levo-2), 4.73 – 4.69 (m, 1H, Levo-3), 4.54 (dd,  $J = 11.5, 2.1$  Hz, 1H, Levo-4), 4.47 (dd,  $J = 9.0, 4.9$  Hz, 1H, Dab<sub>1</sub>- $\alpha$ ), 4.43 – 4.36 (m, 4H, Levo-5 + Dab<sub>2</sub>- $\alpha$  + Dab<sub>3</sub>- $\alpha$  + Dab<sub>4</sub>- $\alpha$ ), 3.64 – 3.54 (m, 6H Levo-6,7,8a,9a), 3.43 – 3.40 (m, 2H, Aliphatic), 3.30 – 3.30 (m, 2H, Levo8b,9b), 3.09 – 3.02 (m, 8H, Dab<sub>1</sub>- $\gamma$  + Dab<sub>2</sub>- $\gamma$  + Dab<sub>3</sub>- $\gamma$  + Dab<sub>4</sub>- $\gamma$ ), 2.98 (s, 3H, Levo-10), 2.29 – 2.25 (m, 2H, Aliphatic), 2.24 – 2.13 (m, 4H, Dab<sub>1</sub>- $\beta$ 1 + Dab<sub>2</sub>- $\beta$ 1 + Dab<sub>3</sub>- $\beta$ 1 + Dab<sub>4</sub>- $\beta$ 1), 2.11 – 2.01 (m, 4H, Dab<sub>1</sub>- $\beta$ 2 + Dab<sub>2</sub>- $\beta$ 2 + Dab<sub>3</sub>- $\beta$ 2 + Dab<sub>4</sub>- $\beta$ 2), 1.65 – 1.58 (m, 4H, Aliphatic), 1.54 (d,  $J = 6.8$  Hz, 3H, Levo-11), 1.45 – 1.28 (m, 16H, Aliphatic).  $^{13}\text{C}$  NMR (126 MHz, Methanol- $d_4$ )  $\delta$  175.62(Levo-1), 175.25(Levo-2), 175.22(Levo-3), 173.48(Dab-1 carbonyl), 172.29(Dab-2 carbonyl), 171.70(Dab-3 carbonyl), 171.48(Dab-4 carbonyl), 165.35(Levo-4), 144.76(Levo-5), 141.10(Aliphatic carbonyl), 129.45(Levo-6), 129.33(Levo-7), 124.46(Levo-8), 115.73, 110.33(Levo-9), 103.77(Levo-10), 68.38(Levo-11), 55.16(Levo-12), 54.09(Levo-13), 51.29(Dab<sub>1</sub>- $\alpha$ ), 51.23(Dab<sub>2</sub>- $\alpha$ ), 51.19(Dab<sub>3</sub>- $\alpha$ ), 50.60(Dab<sub>4</sub>- $\alpha$ ), 47.49(Levo-14), 42.48(Levo-15), 38.75(Aliphatic), 36.38(Dab<sub>1</sub>- $\gamma$ ), 36.26(Dab<sub>2</sub>- $\gamma$  + Dab<sub>3</sub>- $\gamma$  + Dab<sub>4</sub>- $\gamma$ ), 35.27(Aliphatic), 29.76(Dab<sub>1</sub>- $\beta$ ), 29.29(Dab<sub>2</sub>- $\beta$ ), 29.23(Dab<sub>3</sub>- $\beta$ ), 29.21(Dab<sub>4</sub>- $\beta$ ), 29.15(Aliphatic), 29.12(Aliphatic), 29.06, 29.01, 28.97, 26.72, 25.35, 16.75(Levo-16). MALDI-TOF-MS  $m/z$  calcd for C<sub>42</sub>H<sub>68</sub>FN<sub>11</sub>O<sub>7</sub> (M+H)<sup>+</sup> monoisotopic peak: 958.5997; found: 958.583

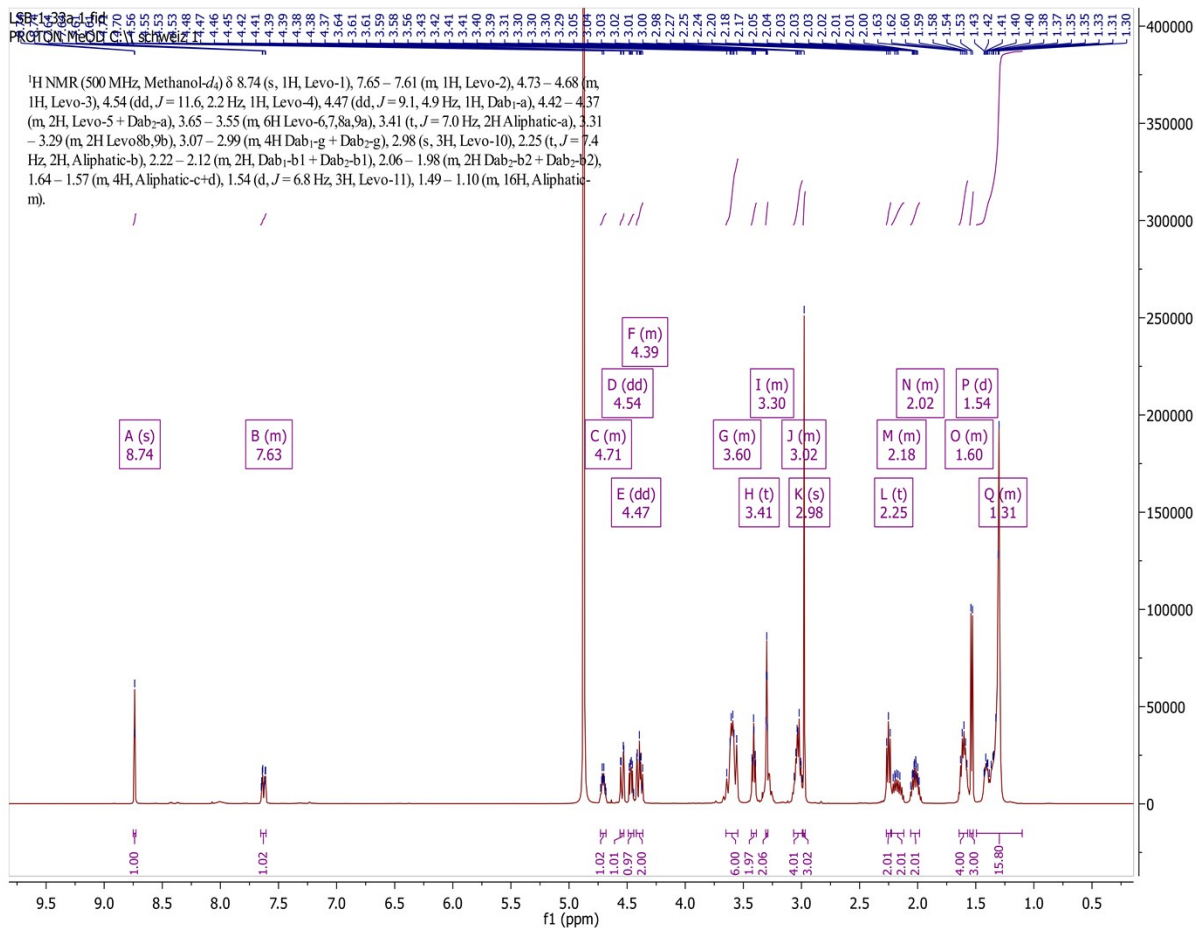

Figure S3. Conjugate 10 <sup>1</sup>H NMR spectra.

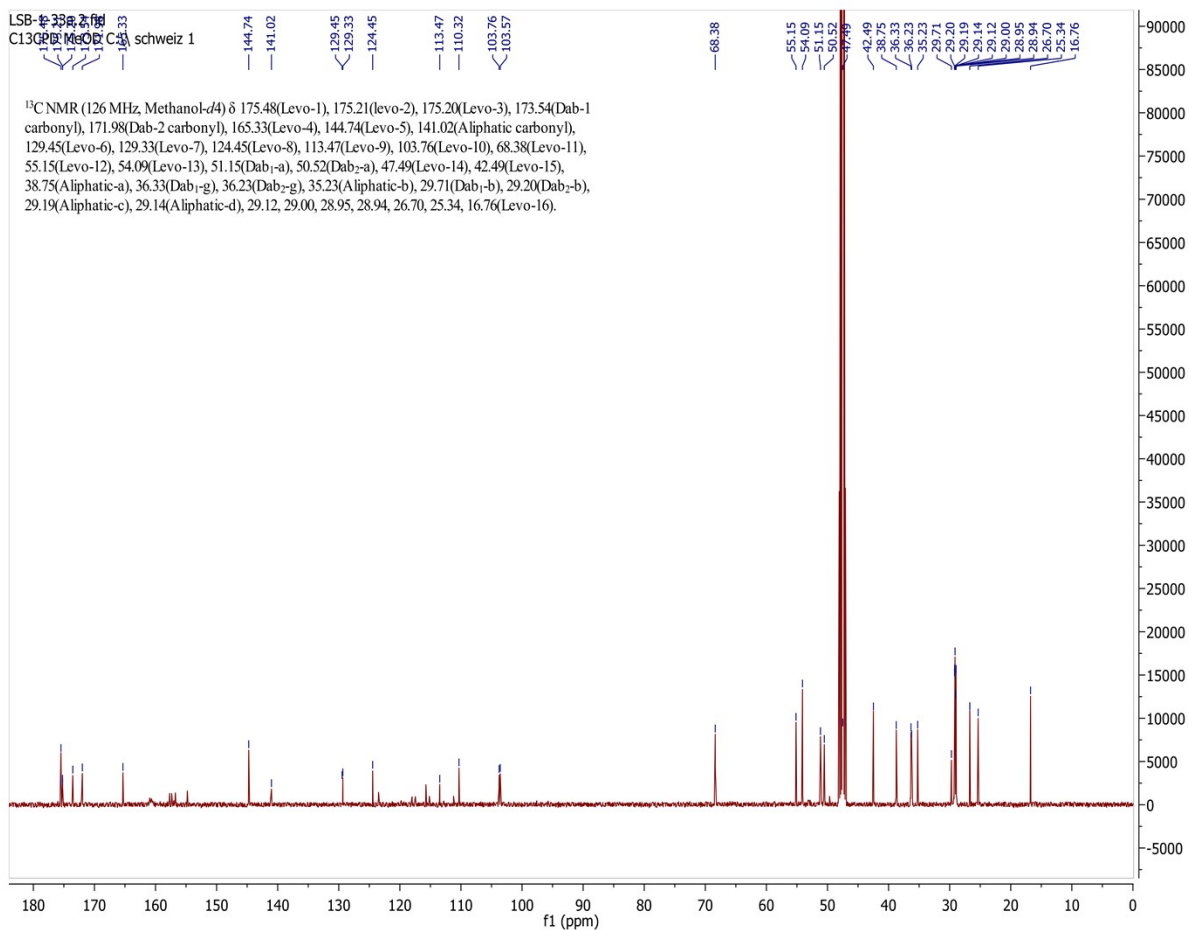

Figure S4. Conjugate 10  $^{13}\text{C}$  NMR spectra.

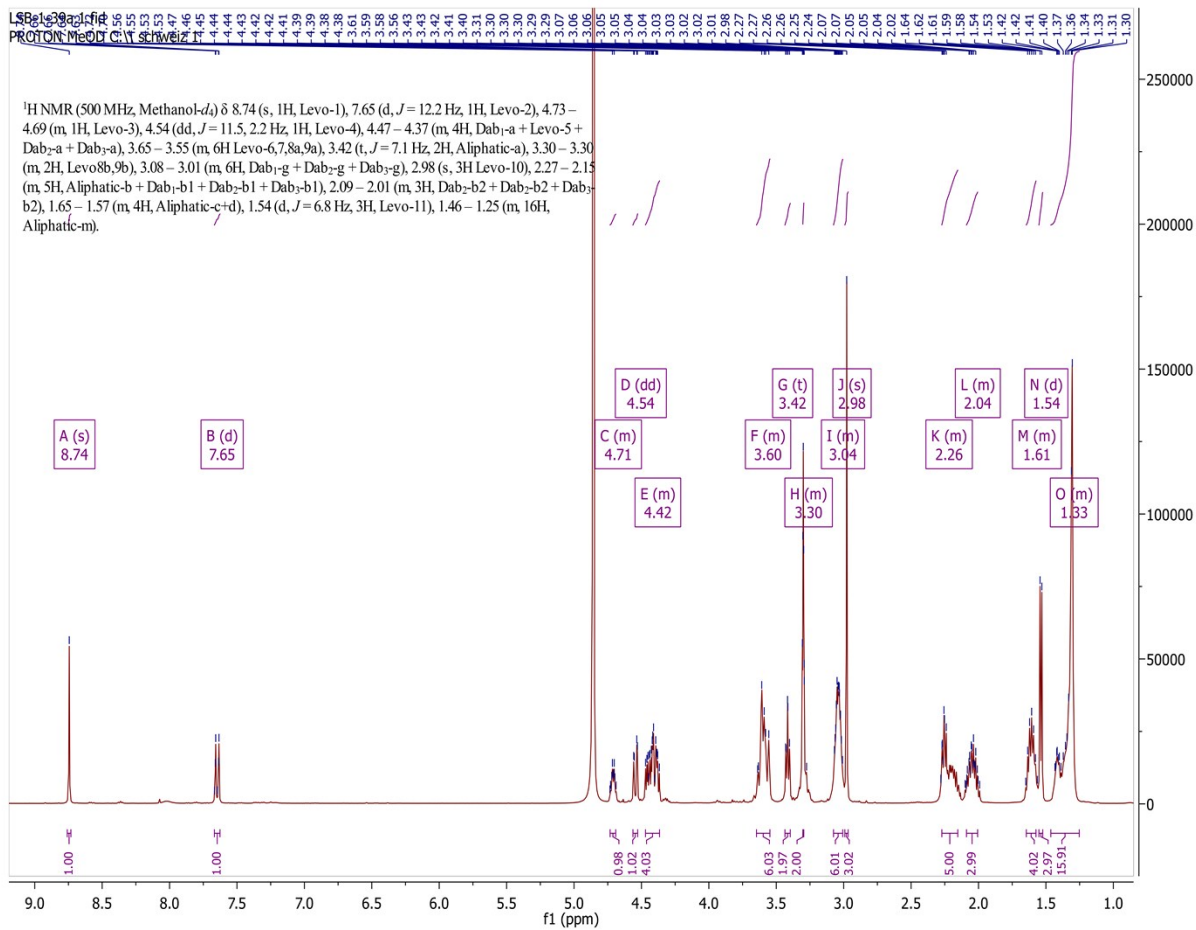

Figure S5. Conjugate **11** <sup>1</sup>H NMR spectra.

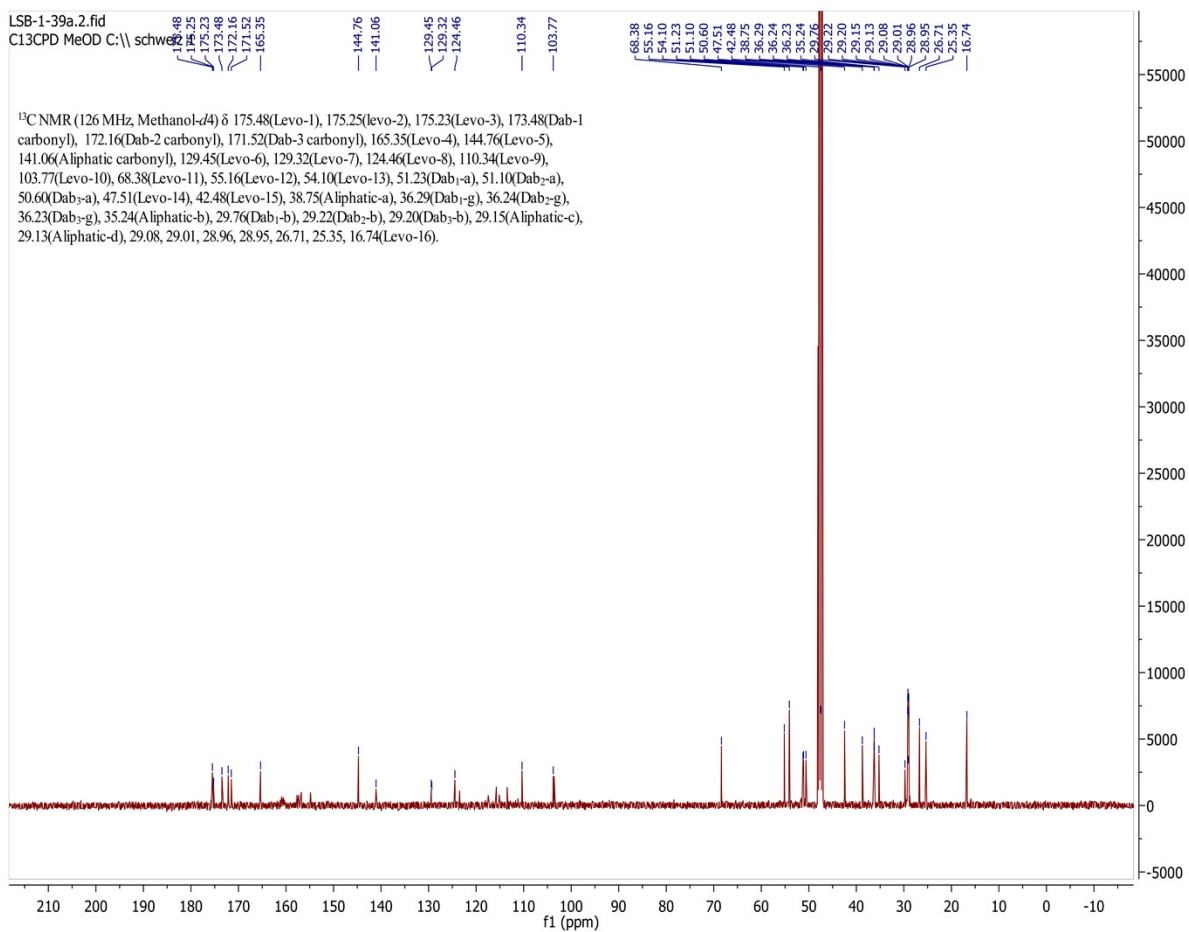

Figure S6. Conjugate **11**  $^{13}\text{C}$  NMR spectra.

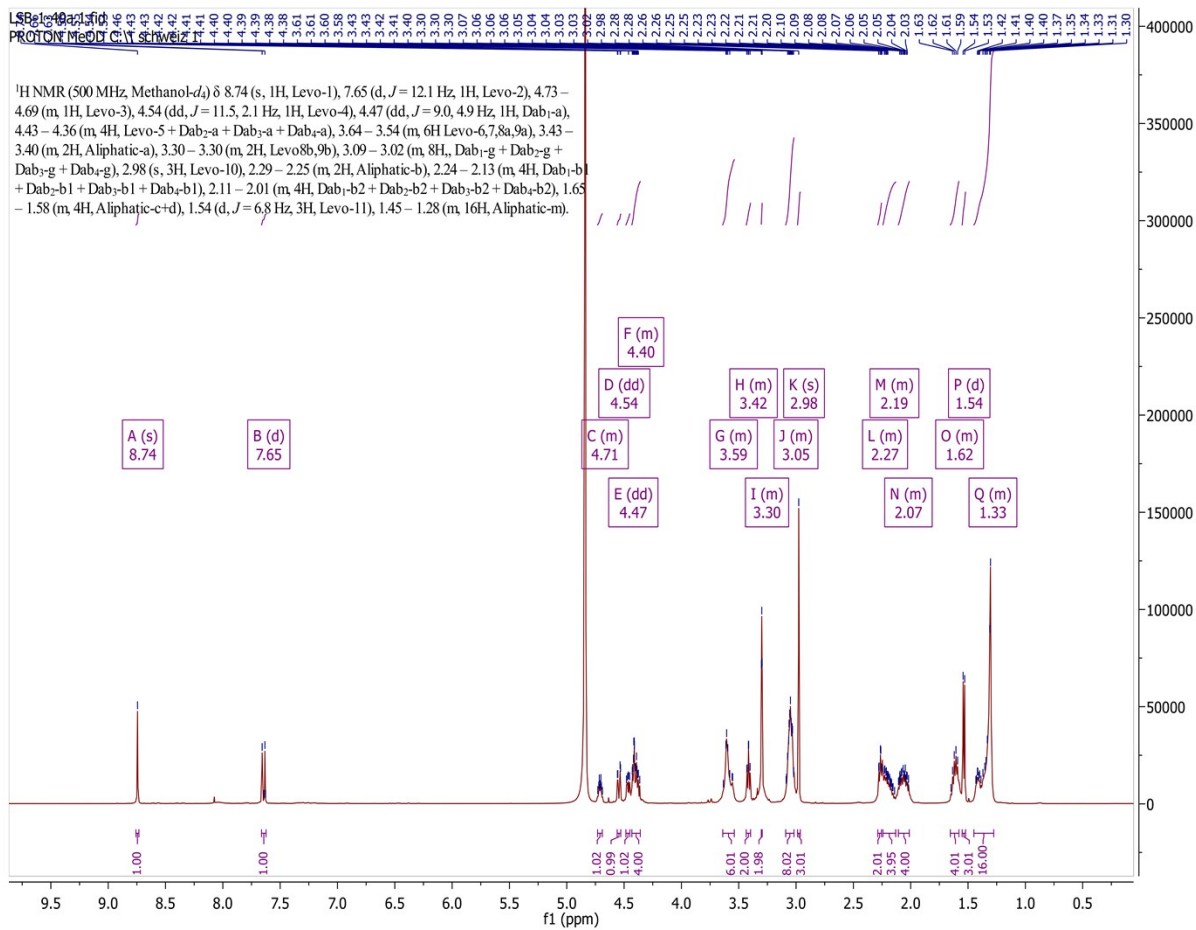

Figure S7. Conjugate 12 <sup>1</sup>H NMR Spectra.

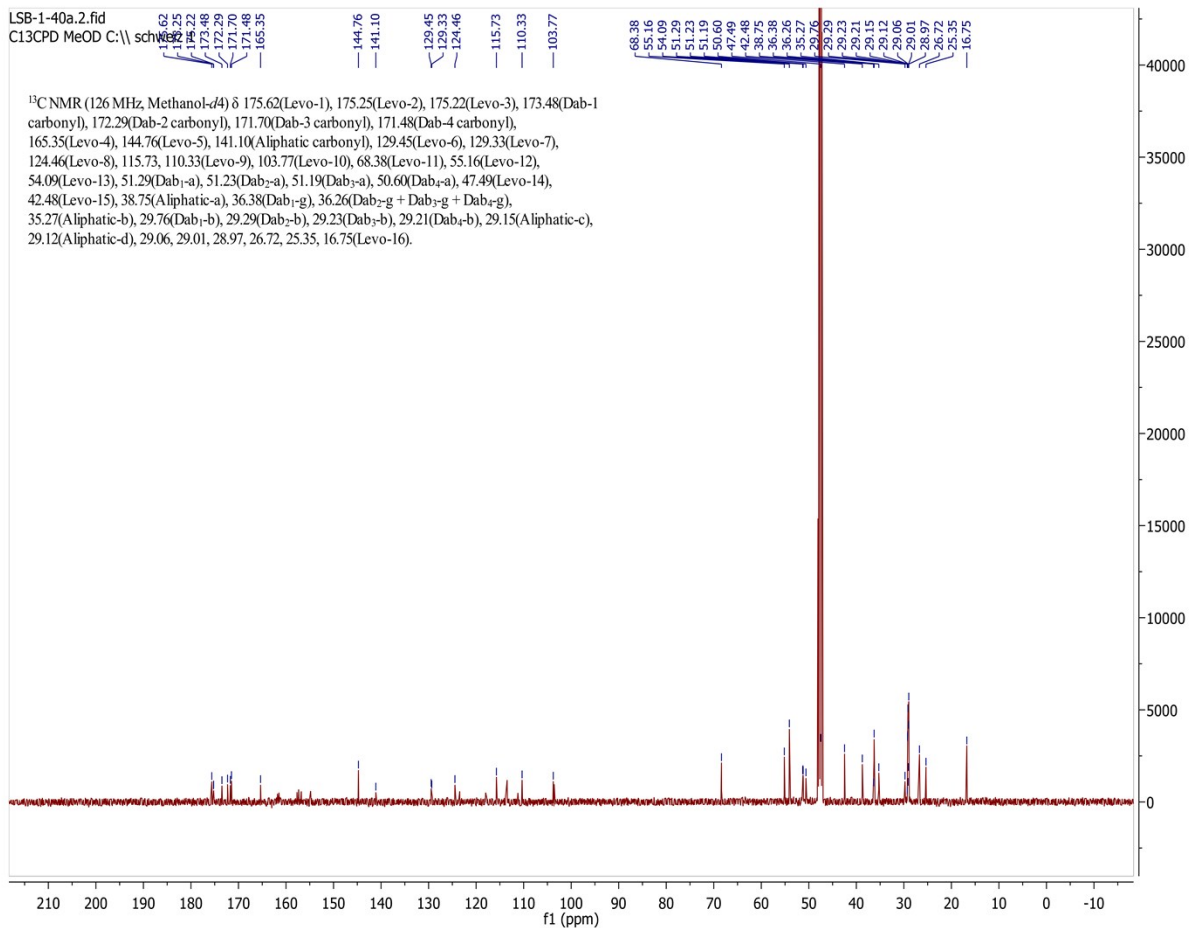

**Figure S8.** Conjugate **12** <sup>13</sup>C NMR spectra.
